# Supplementary material for: Shared and Disorder-Specific Prenatal and Perinatal Risk Factors for Neurodevelopmental Disorders: A nationwide cohort study.
Source: Research Square preprint supplement (doi:10.21203/rs.3.rs-7578702/v1), 2025-09-30
Supplement: Supplementary file 1 [file 5a5e789c092d09621e4e6b57.docx]

# Supplemental material

Hugo Peyre et al. Shared and Disorder-Specific Prenatal and Perinatal Risk Factors for Neurodevelopmental Disorders: A nationwide cohort study.

# Contents

[eTable 1: Identification Algorithm for Neurodevelopmental Disorders (NDDs) in the SNDS – EPI-MERES Framework 2](#_Toc201668345)

[eTable 2: Eight-Year Cumulative Incidence and Follow-up Time for Neurodevelopmental Disorders by Birth Cohort 3](#_Toc201668346)

[eTable 3: Perinatal and Socioeconomic Factors Associated With Autism Spectrum Disorders in Children 4](#_Toc201668347)

[eTable 4: Perinatal and Socioeconomic Factors Associated With Attention Deficit / Hyperactivity Disorders in Children 6](#_Toc201668348)

[Table 5: Perinatal and Socioeconomic Factors Associated With Intellectual Disability in Children 8](#_Toc201668349)

[eTable 6: Perinatal and Socioeconomic Factors Associated With Communication Disorders in Children 10](#_Toc201668350)

[eTable 7: Perinatal and Socioeconomic Factors Associated With Learning Disorders in Children 12](#_Toc201668351)

[eTable 8: Sensitivity analysis :Perinatal and Socioeconomic Factors Associated With Neurodevelopmental Disorders among Children without congenital malformations 14](#_Toc201668352)

eTable 1: Identification Algorithm for Neurodevelopmental Disorders (NDDs) in the SNDS – EPI-MERES Framework

| NDD Category | ICD-10 Codes | Algorithm Criteria |
| --- | --- | --- |
| Autism Spectrum Disorder (ASD) | F84.x (except F84.2, F84.3) | At ≥1 year of age:  ≥2 diagnoses in PMSI-MCO OR ≥1 diagnosis in RIM-P OR At any age:  Long-term disease (LTD) status with corresponding ICD-10 code |
| Attention Deficit/Hyperactivity Disorder (ADHD) | F90.x | At ≥2 years of age:  ≥ 2 diagnoses in PMSI-MCO OR ≥1 diagnosis in RIM-P OR ≥ 2 dispensings of methylphenidate OR ≥ 1 diagnosis + 1 methylphenidate dispensing OR  At any age:  LTD status with corresponding ICD-10 code |
| Intellectual Disability (ID) | F70–F79 | At ≥2 years of age:  • ≥2 diagnoses in PMSI-MCO OR ≥1 diagnosis in RIM-P OR At any age:  LTD status with corresponding ICD-10 code |
| Communication Disorders | F81.0, F81.2, F81.8x | At ≥ 2 years of age:  ≥2 diagnoses in PMSI-MCO OR ≥1 diagnosis in RIM-P OR ≥40 speech therapy sessions (NGAP codes) over 12 consecutive months |
| Learning Disorders | F80.x (except F80.4) | At ≥2 years of age:  ≥2 diagnoses in PMSI-MCO OR ≥1 diagnosis in RIM-P OR ≥40 speech therapy sessions (NGAP codes) over 12 consecutive months |

eTable 2: Eight-Year Cumulative Incidence and Follow-up Time for Neurodevelopmental Disorders by Birth Cohort

|  | Birth cohort 2010-2018 | | | Birth cohort 2010-2013 | | | Birth cohort 2014-2018 | | |
| --- | --- | --- | --- | --- | --- | --- | --- | --- | --- |
| Neurodevelopmental  Disorder (NDD) | Median follow-up (IQR) | N events | Cumulative incidence at 8 years | Median follow-up (IQR) | N events | Cumulative incidence at 8 years | Median follow-up (IQR) | N events | Cumulative incidence at 8 years |
| Any NDD | 9.98  (7.66-12.34) | 511619 | 6.17% (6.15-6.19) | 12.56  (11.47-13.65) | 279118 | 6.10%  (6.07-6.13) | 8.13  (6.84-9.43) | 232501 | 6.22%  (6.20-6.25) |
| Autistic Spectrum Disorder | 10.31  (8.04-12.53) | 66526 | 0.81% (0.80-0.81) | 12.73  (11.72-13.73) | 33049 | 0.73%  (0.72-0.74) | 8.27  (7-9.52) | 33477 | 0.87%  (0.86-0.88) |
| Attention-deficit/hyperactivity disorder | 10.28  (8.04-12.51) | 103503 | 0.80% (0.79-0.80) | 12.71  (11.7-13.72) | 64519 | 0.67%  (0.66-0.68) | 8.27  (7.01-9.52) | 38984 | 0.94%  (0.93-0.95) |
| Intellectual disability | 10.33  (8.07-12.54) | 21137 | 0.27% (0.26-0.27) | 12.74  (11.74-13.74) | 12481 | 0.32%  (0.31-0.32) | 8.28  (7.02-9.54) | 8656 | 0.23%  (0.22-0.23) |
| Communication disorders | 9.53  (6.99-12.13) | 275786 | 3.98% (3.96-3.99) | 12.36  (11.17-13.55) | 132977 | 3.89%  (3.87-3.91) | 7.87  (6.45-9.31) | 142809 | 4.06%  (4.03-4.08) |
| Learning Disorders | 9.74  (7.63-12.16) | 134876 | 1.38% (1.37-1.39) | 12.38  (11.24-13.55) | 91996 | 1.52%  (1.51-1.54) | 8.08  (6.89-9.38) | 42880 | 1.22%  (1.20-1.23) |

eTable 3: Perinatal and Socioeconomic Factors Associated With Autism Spectrum Disorders in Children

|  | **Children with no Neurodevelopmental**  **Disorders**  **N = 6,949,046** | **Children with Autistic Spectrum Disorders**  **N = 66,526** | | | |
| --- | --- | --- | --- | --- | --- |
|  | **n (%)** | **n (%)** | **Crude HR**  **(95% CI)** | **Model 1**  **HR (95% CI)** | **Model 2**  **HR (95% CI)** |
| Male sex | 3,266,014 (50.1) | 51,646 (77.6) | 3.43 (3.37-3.50) | 3.40 (3.34-3.47) | 2.69 (2.64-2.74) |
| Gestational age, (weeks of amenorrhea) |  |  |  |  |  |
| Extremely preterm (22-27) | 12,438 (0.2) | 486 (0.7) | 4.28 (3.91-4.68) | 3.52 (3.21-3.84) | 1.93 (1.76-2.11) |
| Very preterm (28-31) | 39,300 (0.6) | 920 (1.4) | 2.39 (2.24-2.55) | 1.94 (1.82-2.07) | 1.35 (1.26-1.44) |
| Moderate to late preterm (32-36) | 382,052 (5.9) | 5,545 (8.3) | 1.46 (1.42-1.50) | 1.33 (1.29-1.37) | 1.18 (1.15-1.21) |
| At term (37-41) | 5,948,312 (92.4) | 58,914 (88.6) | Reference | Reference | Reference |
| Post term (≥ 42) | 55,123 (0.9) | 661 (1.0) | 1.21 (1.11-1.30) | 1.16 (1.08-1.26) | 1.12 (1.04-1.21) |
| Foetal growth |  |  |  |  |  |
| Small for gestational age | 755,538 (11.7) | 10,540 (15.8) | 1.43 (1.40-1.46) | 1.32 (1.29-1.35) | 1.18 (1.16-1.21) |
| Adequate for gestational age | 4,783,595 (74.3) | 46,371 (69.7) | Reference | Reference | Reference |
| Large for gestational age | 686,840 (10.7) | 7,029 (10.6) | 1.05 (1.03-1.08) | 1.03 (1.00-1.06) | 1.03 (1.00-1.06) |
| Missing | 211,252 (3.3) | 2,586 (3.9) | 1.21 (1.17-1.26) | 1.21 (1.17-1.26) | 1.15 (1.10-1.20) |
| Congenital malformations | 150,051 (2.3) | 3,321 (5.0) | 2.29 (2.22-2.38) | 1.84 (1.77-1.90) | 1.44 (1.39-1.50) |
| Neonatal hypoxia | 693,254 (10.8) | 8,348 (12.5) | 1.21 (1.16-1.26) | 1.17 (1.14-1.19) | 1.13 (1.11-1.16) |
| Maternal age at index child birth, years |  |  |  |  |  |
| < 25 | 966,901 (15.0) | 12,097 (18.2) | 1.29 (1.26-1.32) | 1.11 (1.08-1.13) | 1.04 (1.02-1.06) |
| 25-34 | 4,140,222 (64.3) | 39,347 (59.1) | Reference | Reference | Reference |
| >= 35 | 1,330,102 (20.7) | 15,082 (22.7) | 1.19 (1.18-1.22) | 1.13 (1.11-1.15) | 1.11 (1.08-1.13) |
| Paternal age at index child birth, years |  |  |  |  |  |
| < 25 | 276,039 (4.3) | 3,393 (5.1) | 1.23 (1.19-1.28) | 0.93 (0.90-0.97) | 0.90 (0.87-0.94) |
| 25-34 | 2,332,494 (36.2) | 22,656 (34.1) | Reference | Reference | Reference |
| >= 35 | 1,441,008 (22.4) | 18,212 (27.4) | 1.30 (1.28-1.33) | 1.25 (1.22-1.27) | 1.21 (1.17-1.22) |
| Missing | 2,387,684 (37.1) | 22,265 (33.5) | 0.95 (0.93-0.97) | 0.86 (0.84-0.88) | 0.91 (0.89-0.92) |
| Maternal income |  |  |  |  |  |
| Complementary Universal Health Coverage (C2S) | 1,012,610 (15.7) | 16,608 (25.0) | 2.44 (2.39-2.51) | 2.41 (2.34-2.47) | 1.93 (1.88-1.98) |
| Not C2S and income < median annual salary | 1,498,055 (23.3) | 16,311 (24.5) | 1.62 (1.58 (1.66) | 1.61 (1.57-1.64) | 1.42 (1.38-1.45) |
| Not C2S and income ≥ median annual salary | 1,704,799 (26.5) | 11,328 (17.0) | Reference | Reference | Reference |
| Not C2S, income unknown or no income | 2,221,761 (34.5) | 22,279 (33.5) | 1.49 (1.46-1.53) | 1.50 (1.46-1.53) | 1.41 (1.38-1.44) |
| Maternal defavorisation index |  |  |  |  |  |
| Q1 (least deprived) | 1,213,176 (18.8) | 10,401 (15.6) | Reference | Reference | Reference |
| Q2 | 1,211,915 (18.8) | 12,130 (18.2) | 1.16 (1.13-1.20) | 1.10 (1.07-1.13) | 1.11 (1.08-1.14) |
| Q3 | 1,194,262 (18.6) | 12,282 (18.5) | 1.19 (1.16-1.22) | 1.18 (1.15-1.21) | 1.16 (1.10-1.19) |
| Q4 | 1,176,931 (18.3) | 13,029 (19.6) | 1.28 (1.25-1.31) | 1.22 (1.19-1.35) | 1.23 (1.10-1.16) |
| Q5 (most deprived) | 1,271,746 (19.8) | 15,687 (23.6) | 1.42 (1.39-1.46) | 1.35 (1.32-1.46) | 1.36 (1.33-1.39) |
| Overseas departments and territories | 265,858 (4.1) | 2,211 (3.3) | 0.95 (0.91-0.99) | 0.75 (0/72-0.79) | 0.78 (0.74-0.81) |
| Missing | 103,337 (1.6) | 786 (1.2) | 0.87 (0.81-0.94) | 0.82 (0.76-0.88) | 0.87 (0.81-0.94) |
| Maternal alcohol consumption | 37,259 (0.6) | 853 (1.3) | 2.20 (2.05-2.36) | 1.61 (1.51-1.73) | 1.32 (1.23-1.41) |
| Maternal smoking | 536,637 (8.3) | 7,287 (11.0) | 1.35 (1.32-1.38) | 1.17 (1.14-1.20) | 1.06 (1.04-1.09) |

HR: hazard ratio (95% CI);

Model 1: Adjusted for all covariates listed in the table, excluding other categories of neurodevelopmental disorders.

Model 2: Adjusted for all covariates listed in the table, including the other categories of neurodevelopmental disorders.

eTable 4: Perinatal and Socioeconomic Factors Associated With Attention Deficit / Hyperactivity Disorders in Children

|  | **Children with no Neurodevelopmental**  **Disorders**  **N = 6,949,046** | **Children with Attention Deficit / Hyperactivity Disorders**  **N = 103,503** | | | |
| --- | --- | --- | --- | --- | --- |
|  | **n (%)** | **n (%)** | **Crude HR**  **(95% CI)** | **Model 1**  **HR (95% CI)** | **Model 2**  **HR (95% CI)** |
| Male sex | 3,266,014 (50.1) | 80,208 (77.5) | 3.51 (3.46-3.57) | 3.49 (3.44-3.54) | 3.06 (3.02-3.11) |
| Gestational age, (weeks of amenorrhea) |  |  |  |  |  |
| Extremely preterm (22-27) | 12,438 (0.2) | 666 (0.6) | 4.09 (3.79-4.42) | 3.72 (3.45-4.01) | 2.60 (2.41-2.81) |
| Very preterm (28-31) | 39,300 (0.6) | 1,421 (1.4) | 2.47 (2.34-2.60) | 2.12 (2.01-2.24) | 1.73 (1.64-1.82) |
| Moderate to late preterm (32-36) | 382,052 (5.9) | 8,230 (8.0) | 1.41 (1.39-1.45) | 1.31 (1.28-1.34) | 1.24 (1.21-1.27) |
| At term (37-41) | 5,948,312 (92.4) | 92,281 (89.2) | Reference | Reference | Reference |
| Post term (≥ 42) | 55,123 (0.9) | 905 (0.9) | 1.05 (0.99-1.12) | 1.00 (0.99-1.07) | 0.97 (0.91-1.03) |
| Foetal growth |  |  |  |  |  |
| Small for gestational age | 755,538 (11.7) | 15,989 (15.4) | 1.40 (1.37-1.42) | 1.30 (1.28-1.32) | 1.22 (1.19-1.24) |
| Adequate for gestational age | 4,783,595 (74.3) | 73,167 (70.7) | Reference | Reference | Reference |
| Large for gestational age | 686,840 (10.7) | 10,102 (9.8) | 0.96 (0.93-0.97) | 0.97 (0.95-0.98) | 0.96 (0.94-0.98) |
| Missing | 211,252 (3.3) | 4,245 (4.1) | 1.19 (1.15-1.22) | 1.12 (1.08-1.15) | 1.06 (1.03-1.09) |
| Congenital malformations | 150,051 (2.3) | 4,422 (4.3) | 2.06 (1.99-2.12) | 1.67 (1.62-1.72) | 1.48 (1.43-1.52) |
| Neonatal hypoxia | 693,254 (10.8) | 11,347 (11.0) | 1.06 (1.04-1.08) | 1.02 (1.00-1.04) | 0.98 (0.96-1.01) |
| Maternal age at index child birth, years |  |  |  |  |  |
| < 25 | 966,901 (15.0) | 18,443 (17.8) | 1.18 (1.16-1.20) | 1.16 (1.13-1.18) | 1.13 (1.10-1.15) |
| 25-34 | 4,140,222 (64.3) | 64,795 (62.6) | Reference | Reference | Reference |
| >= 35 | 1,330,102 (20.7) | 20,265 (19.6) | 0.99 (0.97-1.00) | 1.02 (1.00-1.03) | 0.99 (0.97-1.00) |
| Paternal age at index child birth, years |  |  |  |  |  |
| < 25 | 276,039 (4.3) | 6,036 (5.8) | 1.20 (1.18-1.24) | 1.06 (1.03-1.09) | 1.04 (1.00-1.07) |
| 25-34 | 2,332,494 (36.2) | 40,452 (39.1) | Reference | Reference | Reference |
| >= 35 | 1,441,008 (22.4) | 23,288 (22.5) | 0.95 (0.93-0.96) | 0.99 (0.97-1.00) | 0.94 (0.93-0.96) |
| Missing | 2,387,684 (37.1) | 33,727 (32,6) | 0.78 (0.77-0.79) | 0.80 (0.78-0.81) | 0.83 (0.81-0.84) |
| Maternal income |  |  |  |  |  |
| Complementary Universal Health Coverage (C2S) | 1,012,610 (15.7) | 15,740 (15.2) | 0.98 (0.96-1.00) | 1.01 (0.99-1.03) | 0.85 (0.83-0.86) |
| Not C2S and income < median annual salary | 1,498,055 (23.3) | 27,824 (26.9) | 1.14 (1.12-1.16) | 1.12 (1.10-1.13) | 1.02 (1.00-1.04) |
| Not C2S and income ≥ median annual salary | 1,704,799 (26.5) | 27,855 (26.9) | Reference | Reference | Reference |
| Not C2S, income unknown or no income | 2,221,761 (34.5) | 32,084 (31.0) | 0.87 (0.86-0.88) | 0.90 (0.89-0.92) | 0.85 (0.84-0.86) |
| Maternal defavorisation index |  |  |  |  |  |
| Q1 (least deprived) | 1,213,176 (18.8) | 20,897 (20.2) | Reference | Reference | Reference |
| Q2 | 1,211,915 (18.8) | 19,892 (19.2) | 0.96 (0.94-0.98) | 0.93 (0.91-0.95) | 0.92 (0.90-0.94) |
| Q3 | 1,194,262 (18.6) | 19,883 (19.2) | 0.97 (0.95-0.98) | 0.92 (0.90-0.94) | 0.91 (0.89-0.93) |
| Q4 | 1,176,931 (18.3) | 19,230 (18.6) | 0.94 (0.92-0.96) | 0.87 (0.86-0.89) | 0.87 (0.85-0.89) |
| Q5 (most deprived) | 1,271,746 (19.8) | 20,353 (19.7) | 0.92 (0.90-0.93) | 0.85 (0.83-0..86) | 0.84 (0.82-0.86) |
| Overseas departments and territories | 265,858 (4.1) | 1,601 (1.5) | 0.33 (0.32-0.35) | 0.34 0.33-0.36) | 0.33 (0.32-0.35) |
| Missing | 103,337 (1.6) | 1,647 (1.6) | 0.89 (0.85-0.94) | 0.85 (0.81-0.90) | 0.87 (0.82-0.91) |
| Maternal alcohol consumption | 37,259 (0.6) | 1,467 (1.4) | 2.52 (2.40-2.66) | 2.00 (1.90-2.11) | 1.78 (1.69-1.88) |
| Maternal smoking | 536,637 (8.3) | 14,025 (13.6) | 1.77 (1.74-1.80) | 1.63 (1.60-1.66) | 1.58 (1.55-1.61) |

HR: hazard ratio (95% CI);

Model 1: Adjusted for all covariates listed in the table, excluding other categories of neurodevelopmental disorders.

Model 2: Adjusted for all covariates listed in the table, including the other categories of neurodevelopmental disorders.

Table 5: Perinatal and Socioeconomic Factors Associated With Intellectual Disability in Children

|  | **Children with no Neurodevelopmental**  **Disorders**  **N = 6,949,046** | **Children with Intellectual Disability**  **N = 21,137** | | | |
| --- | --- | --- | --- | --- | --- |
|  | **n (%)** | **n (%)** | **Crude HR**  **(95% CI)** | **Model 1**  **HR (95% CI)** | **Model 2**  **HR (95% CI)** |
| Male sex | 3,266,173 (50.1) | 13,239 (62.6) | 1.64 (1.59-1.68) | 1.55 (1.51-1.86) | 1.14 (1.10-1.17) |
| Gestational age, (weeks of amenorrhea) |  |  |  |  |  |
| Extremely preterm (22-27) | 12,441 (0.2) | 394 (1.9) | 11.34 (10.26-12.53) | 5.61 (5.07-6.21) | 3.42 (3.08-3.78) |
| Very preterm (28-31) | 39,320 (0.6) | 746 (3.5) | 6.44 (5.99-6.93) | 3.32 (3.08-3.59) | 2.64 (2.45-2.85) |
| Moderate to late preterm (32-36) | 382,143 (5.9) | 2,410 (11.4) | 2.14 (2.06-2.24) | 1.65 (1.58-1.72) | 1.45 (1.42-1.55) |
| At term (37-41) | 5,948,400 (92.4) | 17,406 (82.3) | Reference | Reference | Reference |
| Post term (≥ 42) | 55,123 (0.9) | 181 (0.9) | 1.12 (0.97-1.29) | 1.06 (0.91-1.22) | 1.02 (0.88-1.17) |
| Foetal growth |  |  |  |  |  |
| Small for gestational age | 755,620 (11.7) | 4,825 (22.8) | 2.25 (2.18-2.33) | 1.78 (1.72-1.85) | 1.56 (1.54-1.64) |
| Adequate for gestational age | 4,783,708 (74.3) | 13,428 (63.5) | Reference | Reference | Reference |
| Large for gestational age | 686,844 (10.7) | 2,048 (9.7) | 1.06 (1.01-1.11) | 1.01 (0.96-1.05) | 1.00 (0.96-1.05) |
| Missing | 211,255 (3.3) | 836 (4.0) | 1.37 (1.28-1.47) | 1.25 (1.16-1.34) | 1.15 (1.07-1.23) |
| Congenital malformations | 104,990 (1.6) | 3,672 (17.4) | 9.01 (8.69-9.34) | 6.89 (6.64-7.15) | 5.72 (5.51-5.94) |
| Neonatal hypoxia | 693,274 (10.8) | 3,672 (17.4) | 1.64 (1.58-1.70) | 1.51 (1.46-1.57) | 1.45 (1.39-1.50) |
| Maternal age at index child birth, years |  |  |  |  |  |
| < 25 | 40140,329 (64.3) | 4,178 ((19.8) | 1.45 (1.40-1.50) | 1.17 (1.07-1.16) | 1.09 (1.04-1.13) |
| 25-34 | 4,140,329 (64.3) | 12,120 (57.3) | Reference | Reference | Reference |
| >= 35 | 1,330,175 (20.7) | 4,839 (22.9) | 1.24 (1.20-1.29) | 1.13 (1.09-1.18) | 1.12 (1.06-1.14) |
| Paternal age at index child birth, years |  |  |  |  |  |
| < 25 | 276,039 (4.3) | 1,214 (5.7) | 1.46 (1.38-1.56) | 0.99 (0.93-1.06) | 1.01 (0.95-1.08) |
| 25-34 | 2,332,494 (36.2) | 6,834 (32.3) | Reference | Reference | Reference |
| >= 35 | 1,441,008 (22.4) | 5,878 (27.8) | 1.39 (1.34-1.44) | 1.33 (1.27-1.37) | 1.28 (1.19-1.29) |
| Missing | 2,387,886 (37.1) | 7,211 (34.1) | 1.03 (0.99-1.06) | 0.85 (0.82-0.88) | 0.90 (0.87-0.93) |
| Maternal income |  |  |  |  |  |
| Complementary Universal Health Coverage (C2S) | 1,012,659 (15.7) | 5,996 (28.4) | 3.13 (2.99-3.26) | 2.77 (2.64-2.90) | 2.16 (2.06-2.26) |
| Not C2S and income < median annual salary | 1,498,102 (23.3) | 4,817 (22.8) | 1.70 (1.63-1.78) | 1.61 (1.54-1.68) | 1.40 (1.33-1.46) |
| Not C2S and income ≥ median annual salary | 1,704,838 (26.5) | 3,164 (15.0) | Reference | Reference | Reference |
| Not C2S, income unknown or no income | 2,221,828 (34.5) | 7,160 (33.9) | 1.72 (1.65-1.79) | 1.65 (1.58-1.72) | 1.50 (1.44-1.56) |
| Maternal defavorisation index |  |  |  |  |  |
| Q1 (least deprived) | 1,213,208 (18.8) | 2,873 (13.6) | Reference | Reference | Reference |
| Q2 | 1,211,945 (18.8) | 3,289 15.6) | 1.14 (1.08-1.20) | 1.07 (1.01-1.12) | 1.05 (0.99-1.10) |
| Q3 | 1,194,297 (18.6) | 4,065 (19.2) | 1.43 (1.36-1.50) | 1.26 (1.20-1.32) | 1.26 (1.21-1.32) |
| Q4 | 1,176,986 (18.3) | 4,212 (19.9) | 1.50 (1.43-1.57) | 1.26 (1.20-1.33) | 1.28 (1.22-1.34) |
| Q5 (most deprived) | 1,271,789 (19.8) | 5,351 (25.3) | 1.76 (1.68-1.84) | 1.34 (1.28-1.41) | 1.35 (1.29-1.42) |
| Overseas departments and territories | 265,865 (4.1) | 1,081 (5.1) | 1.69 (1.57-1.81) | 1.23 (1.14-1.32) | 1.22 (1.14-1.31) |
| Missing | 103,337 (1.6) | 266 (1.3) | 1.08 (0.95-1.22) | 0.99 (0.88-1.13) | 1.10 (0.97-1.25) |
| Maternal alcohol consumption | 37,259 (0.6) | 363 (1.7) | 2.93 (2.64-3.25) | 1.68 (1.51-1.86) | 1.50 (1.35-1.67) |
| Maternal smoking | 536,662 (8.3) | 2,587 (12.2) | 1.51 (1.45-1.58) | 1.56 (1.51-1.60) | 1.11 (1.06-1.16) |

HR: hazard ratio (95% CI);

Model 1: Adjusted for all covariates listed in the table, excluding other categories of neurodevelopmental disorders.

Model 2: Adjusted for all covariates listed in the table, including the other categories of neurodevelopmental disorders.

eTable 6: Perinatal and Socioeconomic Factors Associated With Communication Disorders in Children

|  | **Children with no Neurodevelopmental**  **Disorders**  **N = 6,949,046** | **Children with Communication Disorders**  **N = 275,786** | | | |
| --- | --- | --- | --- | --- | --- |
|  | **n (%)** | **n (%)** | **Crude HR**  **(95% CI)** | **Model 1**  **HR (95% CI)** | **Model 2**  **HR 95% CI)** |
| Male sex | 3,266,173 (50.1) | 174,680 (63.3) | 1.72 (1.71-1.74) | 1.71 (1.70-1.73) | 1.57 (1.57-1.58) |
| Gestational age, (weeks of amenorrhea) |  |  |  |  |  |
| Extremely preterm (22-27) | 12,441 (0.2) | 1,372 (0.5) | 2.95 (2.79-3.11) | 2.48 (2.35-2.61) | 1.89 (1.79-1.99) |
| Very preterm (28-31) | 39,320 (0.6) | 3,155 (1.1) | 1.98 (1.91-2.04) | 1.69 (1.63-1.75) | 1.48 (1.42-1.53) |
| Moderate to late preterm (32-36) | 382,143 (5.9) | 21,519 (7.8) | 1.36 (1.34-1.38) | 1.27 (1.25-1.29) | 1.22 (1.20-1.24) |
| At term (37-41) | 5,948,400 (92.4) | 247,423 (89.7) | Reference | Reference | Reference |
| Post term (≥ 42) | 55,123 (0.9) | 2,317 (0.8) | 1.00 (0.97-1.05) | 1.00 (0.96-1.04) | 0.98 (0.94-1.02) |
| Foetal growth |  |  |  |  |  |
| Small for gestational age | 755,620 (11.7) | 40,134 (14.6) | 1.30 (1.29-1.31) | 1.22 (1.21-1.23) | 1.18 (1.16-1.19) |
| Adequate for gestational age | 4,783,708 (74.3) | 195,214 (70.8) | Reference | Reference | Reference |
| Large for gestational age | 686,844 (10.7) | 30,119 (10.9) | 1.07 (1.06-1.09) | 1.06 -1.04-1.07) | 1.06 (1.04-1.07) |
| Missing | 211,255 (3.3) | 10,319 (3.7) | 1.16 (1.14-1.19) | 1.16 (1.13-1.18) | 1.13 (1.11-1.16) |
| Congenital malformations | 104,990 (1.6) | 12,623 (4.6) | 2.13 (2.09-2.17) | 1.86 (1.83-1.89) | 1.71 (1.68-1.74) |
| Neonatal hypoxia | 693,274 (10.8) | 30,692 (11.1) | 1.05 (1.03-1.06) | 1.03 (1.02-1.04) | 1.01 (1.00-1.03) |
| Maternal age at index child birth, years |  |  |  |  |  |
| < 25 | 40140,329 (64.3) | 52,957 (19.2) | 1.33 (1.30-1.35) | 1.13 (1.11-1.14) | 1.11 (1.09-1.12) |
| 25-34 | 4,140,329 (64.3) | 165,652 (60.1) | Reference | Reference | Reference |
| >= 35 | 1,330,175 (20.7) | 57,177 (20.7) | 1.08 (1.07-1.09) | 1.05 (1.04-1.06) | 1.03 (1.02-1.04) |
| Paternal age at index child birth, years |  |  |  |  |  |
| < 25 | 276,039 (4.3) | 15,565 (5.6) | 1.35 (1.33-1.36) | 1.00 (0.98-1.02) | 1.00 (0.98-1.01) |
| 25-34 | 2,332,494 (36.2) | 97,212 (35.2) | Reference | Reference | Reference |
| >= 35 | 1,441,008 (22.4) | 70,776 (25.7) | 1.18 (1.17-1.19) | 1.17 (1.16-1.18) | 1.16 (1.15-1.17) |
| Missing | 2,387,886 (37.1) | 92,233 (33.4) | 1.09 (0.91-0.93) | 0.83 (0.82-0.84) | 0.85 (0.84-0.86) |
| Maternal income |  |  |  |  |  |
| Complementary Universal Health Coverage (C2S) | 1,012,659 (15.7) | 69,519 (25.2) | 2.44 (2.41-2.47) | 2.35 (2.32-2.38) | 2.22 (2.19-2.25) |
| Not C2S and income < median annual salary | 1,498,102 (23.3) | 71,004 (25.7) | 1.68 (1.66-1.70) | 1.66(1.64-1.68) | 1.60 (1.58-1.62) |
| Not C2S and income ≥ median annual salary | 1,704,838 (26.5) | 47,725 (17.3) | Reference | Reference | Reference |
| Not C2S, income unknown or no income | 2,221,828 (34.5) | 87,538 (31.7) | 1.40 (1.38-1.41) | 1.39 (1.37-1.40) | 1.36 (1.35-1.38) |
| Maternal defavorisation index |  |  |  |  |  |
| Q1 (least deprived) | 1,213,208 (18.8) | 42,357 (15.4) | Reference | Reference | Reference |
| Q2 | 1,211,945 (18.8) | 50,704 (18.4) | 1.20 (1.18-1.21) | 1.12 (1.11-1.14) | 1.12 (1.10-1.13) |
| Q3 | 1,194,297 (18.6) | 52,975 (19.2) | 1.27 (1.25-1.28) | 1.13 (1.12-1.14) | 1.13 (1.12-1.15) |
| Q4 | 1,176,986 (18.3) | 50,609 (18.4) | 1.22 (1.21-1.24) | 1.06 (1.04-1.07) | 1.05 (1.04-1.07) |
| Overseas departments and territories | 265,865 (4.1) | 14,649 (5.3) | 1.54 (1.51-1.57) | 1.28 (1.20-1.25) | 1.27 (1.25-1.29) |
| Q5 (most deprived) | 1,271,789 (19.8) | 60,839 (22.1) | 1.36 (1.34-1.38) | 1.09 (1.08-1.11) | 1.10 (1.08-1.11) |
| Missing | 103,337 (1.6) | 3,653 (1.3) | 1.00 (0.97-1.03) | 0.93 (0.89-0.96) | 0.94 (0.91-0.97) |
| Maternal alcohol consumption | 37,259 (0.6) | 2,414 (0.9) | 1.51 (1.44-1.57) | 1.16 (1.12-1.21) | 1.05 (1.01-1.09) |
| Maternal smoking | 536,662 (8.3) | 27,301 (9.9) | 1.21 (1.19-1.22) | 1.09 (1.07-1.10) | 1.05 (1.03-1.06) |

HR: hazard ratio (95% CI);

Model 1: Adjusted for all covariates listed in the table, excluding other categories of neurodevelopmental disorders.

Model 2: Adjusted for all covariates listed in the table, including the other categories of neurodevelopmental disorders.

eTable 7: Perinatal and Socioeconomic Factors Associated With Learning Disorders in Children

|  | **Children with no Neurodevelopmental**  **Disorders**  **N = 6,949,046** | **Children with Learning Disorders**  **N = 134,876** | | | |
| --- | --- | --- | --- | --- | --- |
|  | **n (%)** | **n (%)** | **Crude HR**  **(95% CI)** | **Model 1**  **HR (95% CI)** | **Model 2**  **HR (95% CI)** |
| Male sex | 3,266,173 (50.1) | 63,276 (53.1) | 1.16 (1.15-1.18) | 1.16 (1.15-1.17) | 1.06 (1.04-1.07) |
| Gestational age, (weeks of amenorrhea) |  |  |  |  |  |
| Extremely preterm (22-27) | 12,441 (0.2) | 447 (0.3) | 2.12 (1.93-2.33) | 2.06 (1.87-2.6) | 1.60 (1.46-1.75) |
| Very preterm (28-31) | 39,320 (0.6) | 1,325 (1.0) | 1.75 (1.67-1.85) | 1.66 (1.57-1.76) | 1.44 (1.36-1.52) |
| Moderate to late preterm (32-36) | 382,143 (5.9) | 9,314 (6.9) | 1.21 (1.19-1.24) | 1.19 (1.16-1.21) | 1.14 (1.11-1.16) |
| At term (37-41) | 5,948,400 (92.4) | 122,697 (91.0) | Reference | Reference | Reference |
| Post term (≥ 42) | 55,123 (0.9) | 1,093 (0.8) | 0.95 (0.89-1.01) | 0.94 (0.88-0.99) | 0.92 (0.86-0.97) |
| Foetal growth |  |  |  |  |  |
| Small for gestational age | 755,620 (11.7) | 17,807 (13.2) | 1.18 (1.16-1.20) | 1.14 (1.12-1.16) | 1.09 (1.07-1.10) |
| Adequate for gestational age | 4,783,708 (74.3) | 96,923 (71.9) | Reference | Reference | Reference |
| Large for gestational age | 686,844 (10.7) | 14,238 (10.6) | 1.01 (0.99-1.03) | 1.01 (0.99-1.03) | 1.01 (0.99-1.03) |
| Missing | 211,255 (3.3) | 5,908 (4.4) | 1.26 (1.23-1.29) | 1.16 (1.13-1.19) | 1.13 (1.09-1.16) |
| Congenital malformations | 104,990 (1.6) | 3,862 (2.9) | 1.37 (1.33-1.42) | 1.30 (1.26-1.34) | 1.18 (1.14-1.21) |
| Neonatal hypoxia | 693,274 (10.8) | 121,887 (9.6) | 0.92 (0.90-0.94) | 0.94 (0.92-0.95) | 0.93 (0.92-0.95) |
| Maternal age at index child birth, years |  |  |  |  |  |
| < 25 | 40140,329 (64.3) | 22,539 (16.7) | 1.10 (1.08-1.18) | 1.02 (1.00-1.03) | 0.98 (0.97-1.00) |
| 25-34 | 4,140,329 (64.3) | 85,308 (63.2) | Reference | Reference | Reference |
| >= 35 | 1,330,175 (20.7) | 27,029 (20.0) | 1.00 (0.99-1.02) | 1.05 (1.03-1.07) | 1.04 (1.02-1.06) |
| Paternal age at index child birth, years |  |  |  |  |  |
| < 25 | 276,039 (4.3) | 7,294 (5.4) | 1.15 (1.12-1.18) | 1.05 (1.02-1.08) | 1.04 (1.00-1.06) |
| 25-34 | 2,332,494 (36.2) | 51,382 (38.1) | Reference | Reference | Reference |
| >= 35 | 1,441,008 (22.4) | 30,522 (22.6) | 0.98 (0.97-0.99) | 1.00 (0.98-1.02) | 0.98 (0.97-0.99) |
| Missing | 2,387,886 (37.1) | 45,678 (33.9) | 0.84 (0.83-0.85) | 0.81 (0.80-0.82) | 0.83 (0.82-0.85) |
| Maternal income |  |  |  |  |  |
| Complementary Universal Health Coverage (C2S) | 1,012,659 (15.7) | 22,081 (16.4) | 1.28 (1.26-1.30) | 1.24 (1.21-1.26) | 1.11 (1.09-1.13) |
| Not C2S and income < median annual salary | 1,498,102 (23.3) | 38,145 (28.3) | 1.33 (1.31-1.35) | 1.34 (1.32-1.35) | 1.27 (1.25-1.29) |
| Not C2S and income ≥ median annual salary | 1,704,838 (26.5) | 32,754 (24.3) | Reference | Reference | Reference |
| Not C2S, income unknown or no income | 2,221,828 (34.5) | 41,896 (31.1) | 0.97 (0.95-0.98) | 0.98 (0.97-1.00) | 0.96 (0.95-0.98) |
| Maternal defavorisation index |  |  |  |  |  |
| Q1 (least deprived) | 1,213,208 (18.8) | 22,858 (16.9) | Reference | Reference | Reference |
| Q2 | 1,211,945 (18.8) | 27,469 (20,4) | 1.21 (1.19-1.23) | 1.17 (1.15-1.18) | 1.17 (1.15-1.19) |
| Q3 | 1,194,297 (18.6) | 26,872 (19.9) | 1.20 (1.17-1.22) | 1.13 (1.11-1.15) | 1.13 (1.11-1.15) |
| Q4 | 1,176,986 (18.3) | 24,951 (18.5) | 1.11 (1.09-1.13) | 1.03 (1.02-1.06) | 1.04 (1.02-1.06) |
| Q5 (most deprived) | 1,271,789 (19.8) | 24,735 (18.3) | 1.02 (1.00-1.04) | 0.94 (0.92-0.95) | 0.94 (0.93-0.96) |
| Overseas departments and territories | 265,865 (4.1) | 5,593 (4,1) | 1.07 (1.04-1.10) | 1.07 (1.04-1.10) | 1.07 (1.03-1.09) |
| Missing | 103,337 (1.6) | 2,398 (1.8) | 1.19 (1.14-1.24) | 1.13 (1.08-1.17) | 1.16 (1.12-1.21) |
| Maternal alcohol consumption | 37,259 (0.6) | 999 (0.7) | 1.32 (1.24-1.40) | 1.16 (1.09-1.24) | 1.05 (0.99-1.12) |
| Maternal smoking | 536,662 (8.3) | 13,761 (10.2) | 1.29 (1.27-1.31) | 1.24 (1.21-1.16) | 1.19 (1.17-1.21) |

HR: hazard ratio (95% CI);

Model 1: Adjusted for all covariates listed in the table, excluding other categories of neurodevelopmental disorders.

Model 2: Adjusted for all covariates listed in the table, including the other categories of neurodevelopmental disorders.

eTable 8: Sensitivity analysis :Perinatal and Socioeconomic Factors Associated With Neurodevelopmental Disorders among Children without congenital malformations

|  | **Autistic Spectrum Disorder**  **HR (95% CI)** | **Attention Deficit / Hyperactivity Disorder**  **HR (95% CI)** | **Intellectual Deficiency**  **HR (95% CI)** | **Communication Disorder**  **HR (95% CI)** | **Learning Disorder**  **HR (95 % CI)** |
| --- | --- | --- | --- | --- | --- |
| **Male sex** | 2.72 (2.67-2.77) | 3.10 (3.06-1.85) | 1.10 (1.16-1.23) | 1.58 (1.57-1.59) | 1.06 (1.05-1.07) |
|  |  |  |  |  |  |
| **Gestational age** |  |  |  |  |  |
| Extremely preterm (22-27 wk of amenorrhea) | 2.09 (1.90-2.31) | 2.70 (2.48-2.94) | 5.82 (5.18-6.54) | 2.02 (1.90-2.14) | 1.59 (1.44-1.76) |
| Very preterm (28-31 wk of amenorrhea) | 1.37 (1.27-1.47) | 1.73 (1.64-1.84) | 3.88 (3.56-4.29) | 1.58 (1.57-1.59) | 1.45 (1.37-1.53) |
| Moderate to late preterm (32-36 wk of amenorrhea) | 1.18 (1.15-1.22) | 1.24 (1.21-1.27) | 1.58 (1.50-1.66) | 1.23 (1.21-1.24) | 1.14 (1.11-1.16) |
| At term (37-41 wk of amenorrhea) | Reference | Reference | Reference | Reference | Reference |
| Post term (More than 42 wk of amenorrhea) | 1.12 (1.03-1.20) | 0.98 (0.96-1.00) | 0.98 (0.83-1.15) | 0.99 (0.95-1.02) | 0.91 (0.86-0.97) |
|  |  |  |  |  |  |
| **Foetal growth** |  |  |  |  |  |
| Small for gestational age | 1.18 (1.15-1.21) | 1.21 (1.19-1.23) | 1.57 (1.54-1.64) | 1.17 (1.15-1.18) | 1.09 (1.07-1.11) |
| Adequate for gestational age | Reference | Reference | Reference | Reference | Reference |
| Large for gestational age | 1.04 (1.01-1.06) | 0.96 (0.90-1.03) | 1.01 (0.96-1.05) | 1.06 (1.05-1.07) | 1.00 (0.99-1.03) |
| Missing | 1.16 (1.11-1.21) | 1.06 (1.03-1.09) | 1.15 (1.06-1.23) | 1.12 (1.10-1.15) | 1.12 (1.09-1.55) |
|  |  |  |  |  |  |
|  |  |  |  |  |  |
| **Neonatal hypoxia** | 1.14 (1.11-1.16) | 0.98 (0.96-1.00) | 1.41 (1.35-1.47) | 1.01 (1.00-1.03) | 0.93 (0.91-0.95) |
|  |  |  |  |  |  |
| **Maternal age at index child birth, years** |  |  |  |  |  |
| **< 25** | 1.04 (1.02-1.07) | 1.13 (1.11-1.15) | 1.09 (1.05-1.13) | 1.11 (1.10-1.13) | 0.98 (0.97-1.00) |
| **25-34** | Reference | Reference | Reference | Reference | Reference |
| **>= 35** | 1.11 (1.09-1.15) | 0.99 (0.96-1.00) | 1.10 (1.06-1.14) | 1.02 (1.01-1.03) | 1.04 (1.03-1.06) |
|  |  |  |  |  |  |
| **Paternal age at index child birth, years** |  |  |  |  |  |
| **< 25** | 0.90 (0.87-0.94) | 1.04 (1.00-1.07) | 0.99 (0.92-1.07) | 1.00 (0.98-1.02) | 1.04 (1.03-1.06) |
| **25-34** | Reference | Reference | Reference | Reference | Reference |
| **>= 35** | 1.20 (1.17-1.23) | 0.95 (0.93-0.96) | 1.24 (1.19-1.29) | 1.16 (1.14-1.17) | 0.98 (0.97-0.99) |
| **Missing** | 0.90 (0.88-0.92) | 0.82 (0.81-0.84) | 0.90 (0.87-0.94) | 0.84 (0.83-0.85) | 0.83 (0.82-0.85) |
|  |  |  |  |  |  |
| **Maternal income** |  |  |  |  |  |
| Complementary Universal Health Coverage (C2S) | 1.94 (1.89-2.00) | 0.85 (0.83-0.86) | 2.28 (2.16-2.40) | 2.25 (2.22-2.28) | 1.12 (1.09-1.14) |
| Not C2S and income < median annual salary | 1.42 (1.39-1.45) | 1.02 (1.00-1.04) | 1.42 (1.35-1.49) | 1.61 (1.59-1.63) | 1.27 (1.25-1.29) |
| Not C2S and income ≥ median annual salary | Reference | Reference | Reference | Reference | Reference |
| Not C2S, income unknown or no income | 1.42 (1.38-1.46) | 0.85 (0.83-0.86) | 1.51 (1.44-1.59) | 1.37 (1.35-1.39) | 0.83 (0.82-0.84) |
|  |  |  |  |  |  |
| **Maternal defavorisation index** |  |  |  |  |  |
| **Overseas departments and territories** | 0.77 (0.73-0.81) | 0.33 (0.32-0.35) | 1.23 (1.14-1.34) | 1.27 (1.24-1.29) | 1.07 (1.03-1.09) |
| **Q1 (least deprived)** | Reference | Reference | Reference | Reference | Reference |
| **Q2** | 1.11 (1.08-1.14) | 0.92 (0.91-0.94) | 1.07 (0.99-1.10) | 1.13 (1.10-1.14) | 1.17 (1.15-1.19) |
| **Q3** | 1.07 (1.10-1.19) | 0.92 (0.90-0.93) | 1.31 (1.24-1.38) | 1.13 (1.11-1.15) | 1.14 (1.11-1.16) |
| **Q4** | 1.14 (1.10-1.17) | 0.87 (0.86-0.89) | 1.32 (1.25-1.39) | 1.05 (1.04-1.06) | 1.04 (1.02-1.06) |
| **Q5 (most deprived)** | 1.17 (1.14-1.20) | 0.84 (0.83-0.86) | 1.39 (1.32-1.46) | 1.09 (1.08-1.11) | 0.94 (0.93-0.96) |
| **Missing** | 0.88 (0.81-0.94) | 0.86 (0.82-0.91) | 1.19 (1.04-1.36) | 0.94 (0.91-0.97) | 1.17 (1.12-1.22) |
|  |  |  |  |  |  |
| **Maternal alcohol consumption** | 1.36 (1.26-1.45) | 1.75 (1.66-1.85) | 1.48 (1.32-1.67) | 1.05 (1.04-1.06) | 1.06 (0.99-1.13) |
|  |  |  |  |  |  |
| **Maternal smoking** | 1.07 (1.04-1.10) | 1.58 (1.55-1.61) | 1.13 (1.08-1.18) | 1.05 (1.03-1.06) | 1.19 (1.17-1.21) |

HR: hazard ratio (95% CI); adjusted for all covariates listed in the table, excluding other categories of neurodevelopmental disorders.
